# Supplementary material
Source: PubMed Central journal article supplement (PMC3263941)
Supplement: supp_111.039925_supplemental_Figure_S1_39925.pdf [file supp_111.039925_supplemental_Figure_S1_39925.pdf]

**Title:** UDP-GLUCURONOSYLTRANSFERASE  
EXPRESSION IN MOUSE LIVER IS INCREASED IN  
OBESITY AND FASTING-INDUCED STEATOSIS

**Authors:** Jialin Xu, Supriya R. Kulkarni,  
Liya Li, and Angela L. Slitt

**Journal:** Drug Metabolism Disposition

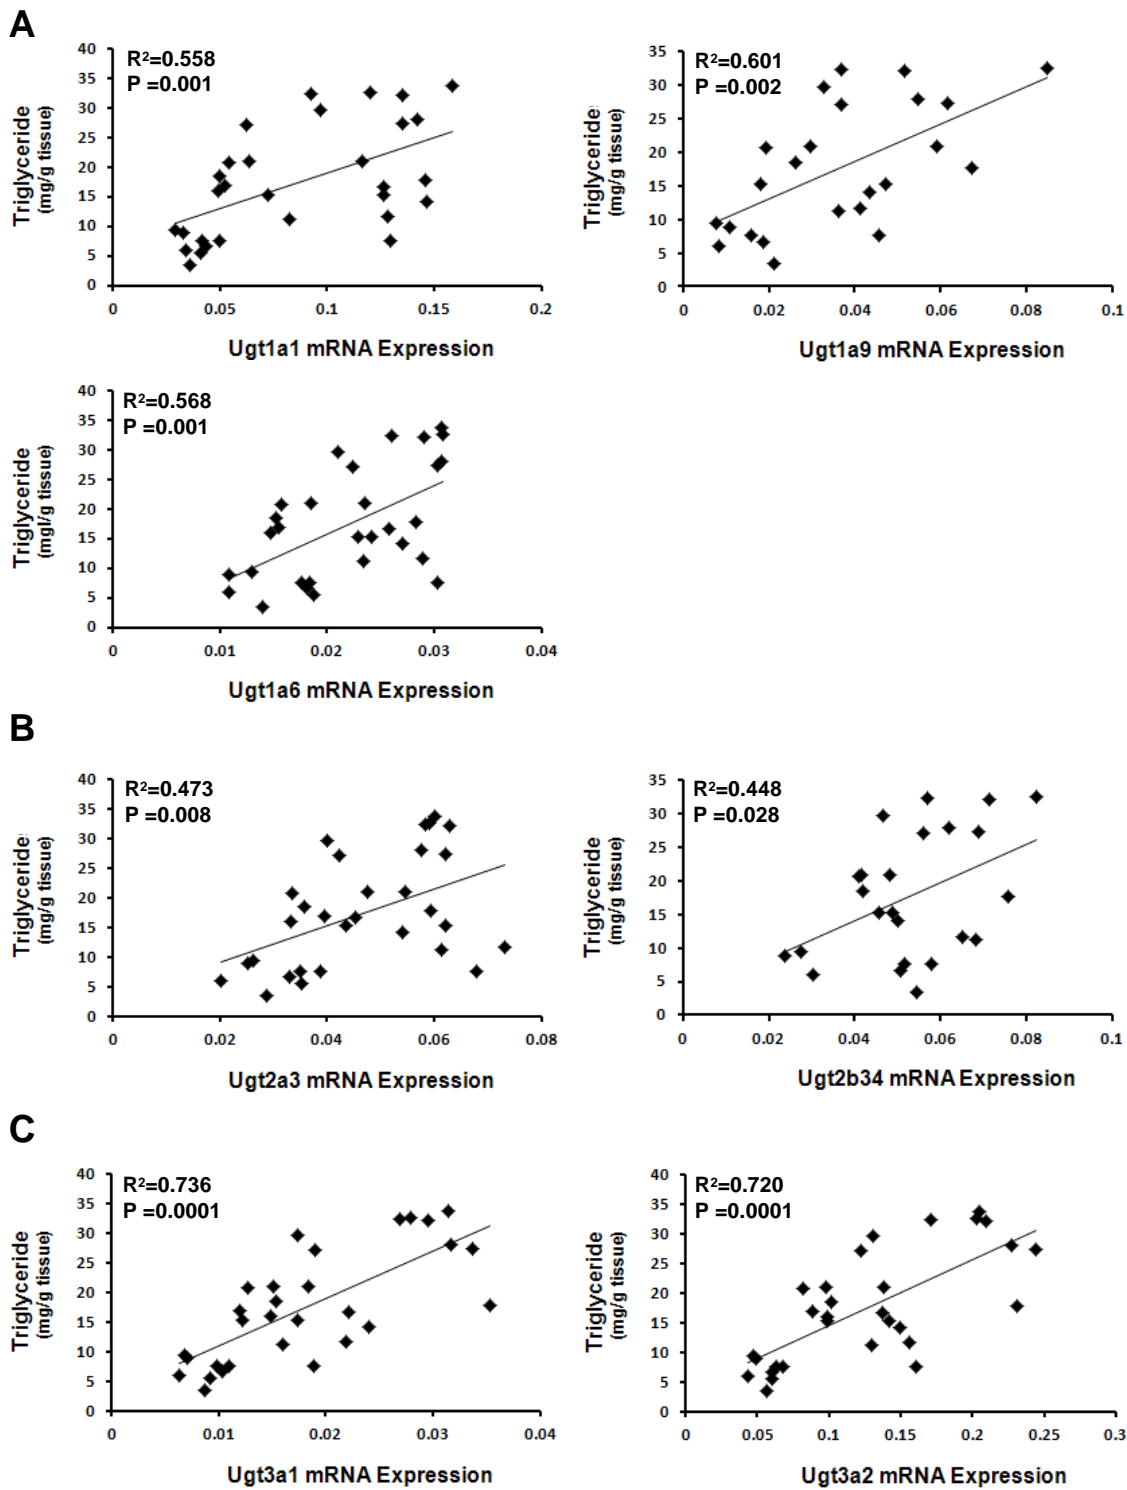

**Supplemental Fig. S1.** Correlation coefficient analysis of Ugt isoform expression and hepatic triglyceride content. Relative mRNA levels of Ugt1a1, 1a6, 1a9 (A), 2a3, 2b34 (B), 3a1, 3a2 (C) were plotted against corresponding hepatic triglyceride. The correlation coefficient ( $R^2$ ) was determined by using Pearson r correlation with significance set as  $P < 0.05$ .
