# Supplementary material
Source: PubMed Central journal article supplement (PMC3263941)
Supplement: supp_111.039925_Supplemental_Table_S1_39925.pdf [file supp_111.039925_Supplemental_Table_S1_39925.pdf]

**Title:** UDP-GLUCURONOSYLTRANSFERASE EXPRESSION IN MOUSE LIVER IS INCREASED IN OBESITY AND FASTING-INDUCED STEATOSIS

**Authors:** Jialin Xu, Supriya R. Kulkarni, Liya Li, and Angela L. Slitt

**Journal:** Drug Metabolism Disposition

**Supplemental Table S1: Primer sequences for quantitative real time PCR.**

| <b>Standard</b> | <b>Type</b> | <b>Sequence</b>                | <b>Genebank</b>         |
|-----------------|-------------|--------------------------------|-------------------------|
|                 |             |                                | <b>Accession Number</b> |
| Ugt1a1          | Forward     | GCT TCT TCC GTA CCT TCT GTT G  | NM_201645               |
|                 | Reverse     | GCT GCT GAA TAA CTC CAA GCA T  |                         |
| Ugt1a2          | Forward     | ATG GAC ACG GGA CTA TGT GTG    | NM_013701               |
|                 | Reverse     | CAT GGG TAA CAC CAG CAC TTT T  |                         |
| Ugt1a6          | Forward     | GTT TCT CTT CCT AGT GCT TTG GG | NM_145079               |
|                 | Reverse     | CCT CGT TCA CTG AGA TGT TCT AC |                         |
| Ugt1a7          | Forward     | CCA CTG GTT TAC GAT GCA GAC    | NM_201642               |
|                 | Reverse     | CCT CCT GCG TAT GAG AAA CTG    |                         |
| Ugt1a9          | Forward     | TCT CGC TCC CAT CAG TAA TCT T  | NM_201644               |
|                 | Reverse     | TGG TTC CAC ACT CTC TCC TTG    |                         |
| Ugt2b1          | Forward     | GTG CTG GTG TGG CCT ACA G      | NM_152811               |
|                 | Reverse     | ATT GCT CGG CCC AAT GAG G      |                         |
| Ugt2b5          | Forward     | ACG AGG CGA TCT ATC ATG GAA    | NM_009467               |
|                 | Reverse     | GAC CTC CTC CAG TGC ATT GAG    |                         |
| Ugt2b34         | Forward     | TGA AGT GAT GGT TCT GAG ACC T  | NM_153598               |
|                 | Reverse     | GCA GAT GTG TTG TCA ACC TCA TA |                         |
| Ugt2b35         | Forward     | TCT CCT GGC TAC CAA GTT GAA    | NM_172881               |
|                 | Reverse     | GGG AGT ACA AAT CCT CCA CTG TT |                         |
| Ugt2b36         | Forward     | CAA GTG GCT TCC CCA AAA TGA    | NM_001029867            |

|               |         |                                |              |
|---------------|---------|--------------------------------|--------------|
|               | Reverse | ATG GAT CGC CTC GTA GAG TCC    |              |
| Ugt2a3        | Forward | CGT GTG GCC CTG TGA TAT GAG    | NM_028094    |
|               | Reverse | GTG CAG TGG AAT ACG TTT ACT CT |              |
| Ugt3a1        | Forward | AAA CGC CCC CTT GTC ATA TG     | NM_207216    |
|               | Reverse | CCT TCG CTT CTT GGT GAA ATG    |              |
| Ugt3a2        | Forward | CAC TCA TGG AGG GAT GAA CAG T  | NM_144845    |
|               | Reverse | TGG TGA GCG CAA ATG ACT CTG    |              |
| AhR           | Forward | AGC CGG TGC AGA AAA CAG TAA    | NM_013464    |
|               | Reverse | AGG CGG TCT AAC TCT GTG TTC    |              |
| CAR           | Forward | ATA TGG GCC GAG GAA CTG TGT    | NM_009803    |
|               | Reverse | GGC GTG GAA ATG ATA GCC TGT    |              |
| PXR           | Forward | GAT GGA GGT CTT CAA ATC TGC C  | NM_010936    |
|               | Reverse | GGC CCT TCT GAA AAA CCC CT     |              |
| PPAR $\alpha$ | Forward | AGA GCC CCA TCT GTC CTC TC     | NM_011144    |
|               | Reverse | ACT GGT AGT CTG CAA AAC CAA A  |              |
| Nrf2          | Forward | TCT TGG AGT AAG TCG AGA AGT GT | NM_010902    |
|               | Reverse | GTT GAA ACT GAG CGA AAA AGG C  |              |
| PGC1 $\alpha$ | Forward | TAT GGA GTG ACA TAG AGT GTG CT | NM_008904    |
|               | Reverse | CCA CTT CAA TCC ACC CAG AAA G  |              |
| Cyp1a1        | Forward | CTA CAG GAC ATT TGA GAA GGG C  | NM_001136059 |
|               | Reverse | AGG TCC AAA ACA ATC GTG ATG AC |              |
| Cyp2b10       | Forward | GAC TTT GGG ATG GGA AAG AG     | NM_009999    |
|               | Reverse | CCA AAC ACA ATG GAG CAG AT     |              |

|         |         |                                |           |
|---------|---------|--------------------------------|-----------|
| Cyp4a10 | Forward | AGA ACT TCC CAA GTG CCT TTC    | NM_010011 |
|         | Reverse | GCA AAC CAT ACC CA TTA GCC TTT |           |
| Oatp2   | Forward | TTG CTG ACT GCA ACA CAA AG     | NM_030687 |
|         | Reverse | TGG TTC CAG TTC CAA CAG AC     |           |
| Gclc    | Forward | GGG GTG ACG AGG TGG AGT A      | NM_010295 |
|         | Reverse | GTT GGG GTT TGT CCT CTC CC     |           |
| Nqo1    | Forward | AGG ATG GGA GGT ACT CGA ATC    | NM_008706 |
|         | Reverse | AGG CGT CCT TCC TTA TAT GCT A  |           |
| 18S     | Forward | AGT CCC TGC CCT TTG TAC ACA    | NR_003278 |
|         | Reverse | CGA TCC GAG GGC CTC ACT A      |           |

---
