# Supplementary material
Source: PubMed Central journal article supplement (PMC3263941)
Supplement: supp_111.039925_Supplemental_Table_S2_39925.pdf [file supp_111.039925_Supplemental_Table_S2_39925.pdf]

**Title:** UDP-GLUCURONOSYLTRANSFERASE EXPRESSION IN MOUSE LIVER IS INCREASED IN OBESITY AND FASTING-INDUCED STEATOSIS

**Authors:** Jialin Xu, Supriya R. Kulkarni, Liya Li, and Angela L. Slitt

**Journal:** Drug Metabolism Disposition

**Supplemental Table S2: Summary of Ugt mRNA changes in C57BL/6J and ob/ob mice by fasting**

|         | Steatotic | Fasted<br>Non-Steatotic | Fasted<br>Steatotic |
|---------|-----------|-------------------------|---------------------|
| Ugt1a1  | ↑         | ↑                       | ↑                   |
| Ugt1a2  | –         | –                       | –                   |
| Ugt1a6  | ↑         | ↑                       | ↑                   |
| Ugt1a7  | –         | ↑                       | ↑                   |
| Ugt1a9  | ↑         | ↑                       | ↑                   |
| Ugt2b1  | ↓         | ↑                       | ↑                   |
| Ugt2b5  | –         | ↑                       | ↑                   |
| Ugt2b34 | –         | –                       | ↑                   |
| Ugt2b35 | –         | –                       | –                   |
| Ugt2b36 | –         | –                       | –                   |
| Ugt2a3  | ↑         | ↑                       | ↑                   |
| Ugt3a1  | ↑         | ↑                       | ↑                   |
| Ugt3a2  | ↑         | ↑                       | ↑                   |

“↑”, increased; “↓”, decreased; “–”, no significant different.
